# Supplementary material for: Facile synthetic routes for photocatalytic Pb3(BTC)2·H2O coordination polymers
Source: Royal Society of Chemistry journal article supplement (doi:10.1039/d1ra03346h), 2021-01-01
Supplement: d1ra03346h1.pdf [file d1ra03346h1.pdf]

## Supporting Information

### Facile Synthetic Routes for Photocatalytic $\text{Pb}_3(\text{BTC})_2 \cdot \text{H}_2\text{O}$ Coordination Polymer

Jinxiu Ma,<sup>a</sup> Zhijuan Feng,<sup>a</sup> Jianyu Wei\*<sup>b</sup>, Feng Li\*<sup>a, c</sup>, Taohai Li<sup>a, c</sup> and Dabin Zhang<sup>d</sup>

<sup>a</sup>College of Chemistry, Key Lab of Environment Friendly Chemistry and Application in Ministry of Education, Xiangtan University, Xiangtan, 411105, China. E-mail: fengli@xtu.edu.cn

<sup>b</sup>China Tobacco Guangxi Industrial Co., Ltd, Nanning, Guangxi 530001, PR China. E-mail: jtx\_wjy@163.com

<sup>c</sup>Nano and Molecular Systems Research Unit, Faculty of Science, University of Oulu, P.O. Box 3000, FIN-90014, Finland

<sup>d</sup>School of Mechanical Engineering, Guizhou University, Guiyang, Guizhou 550025, China

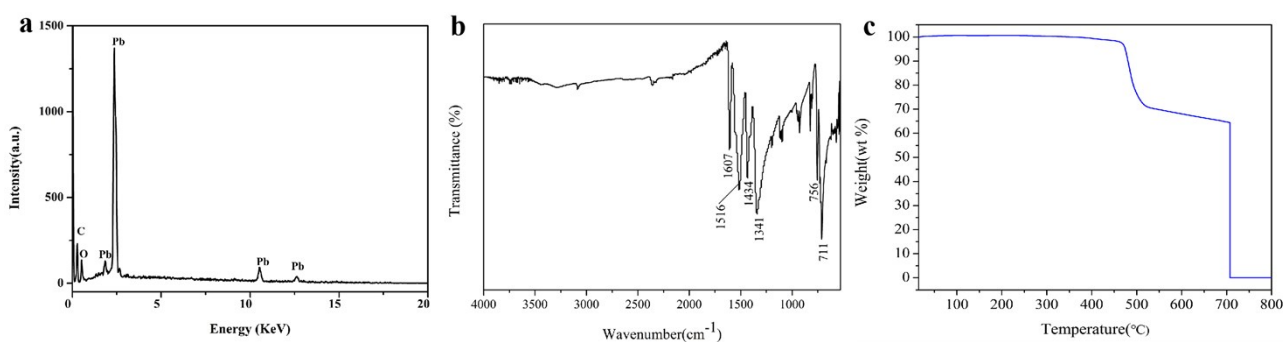

Figure S1. (a) EDS (b) IR spectrum (c) Thermal gravimetric analysis of sample HT.

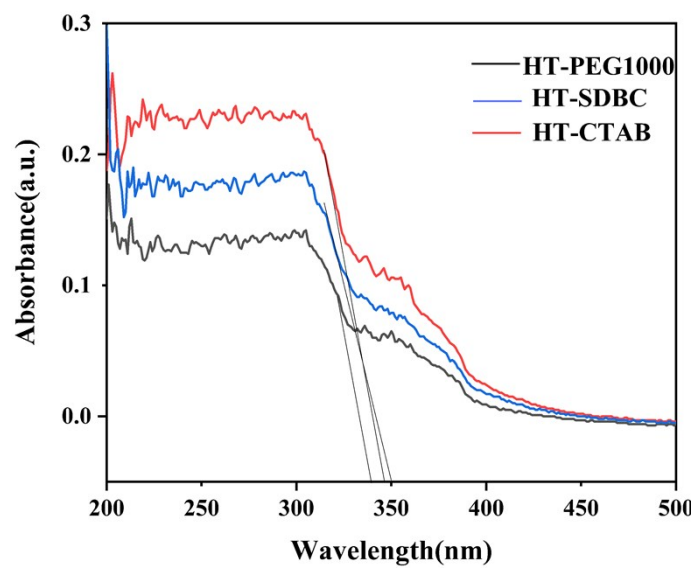

Figure S2. UV - Vis diffuses reflectance spectra of samples prepared by different surfactants.

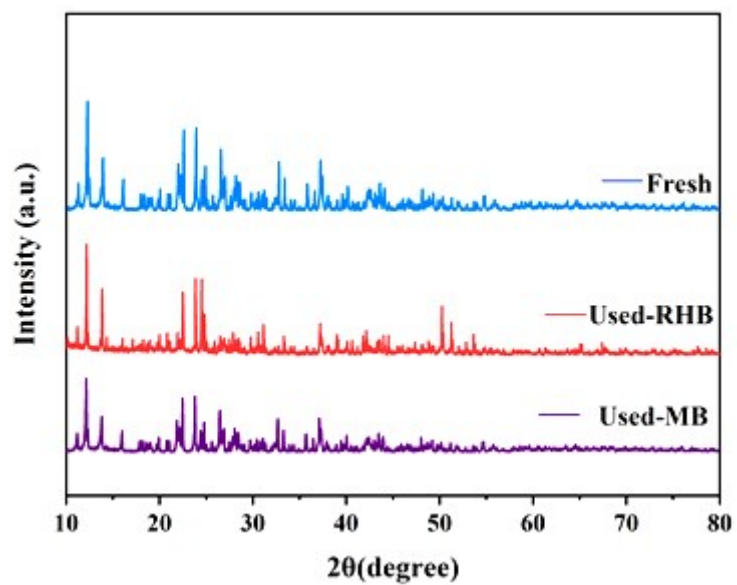

Figure S3. XRD patterns of the fresh and the used HT after 5 recycling runs.

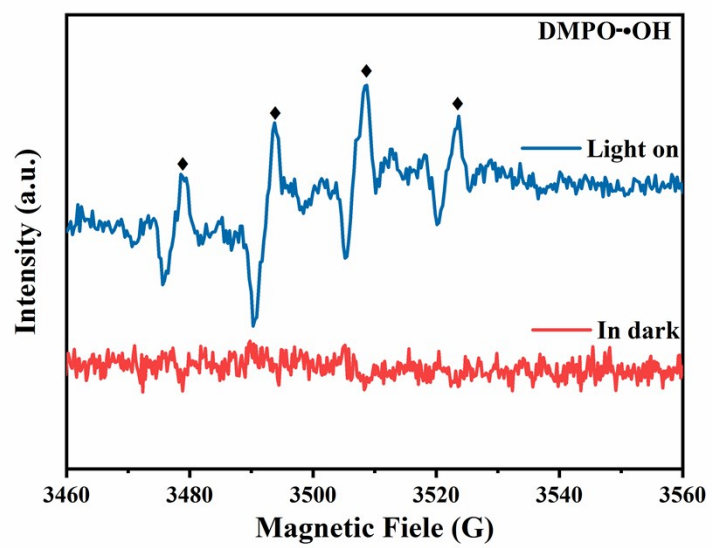

Figure S4. EPR signals of the DMPO-OH with irradiation for 7 min.
